# Supplementary material
Source: publisher site journal article supplement (https://www.dovepress.com/article/453035)
Supplement: Supplementary file 1 [file get_supplementary_file.php]

REVIEW

**Activation likelihood estimation neuroimaging meta-analysis: A powerful tool for emotion research**

Tommaso Costa1,2, Mario Ferraro1,2,3, Jordi Manuello1,2*, Alessia Camasio2,3, Andrea Nani2, Lorenzo Mancuso2, Franco Cauda1,2, Peter T. Fox4,5,Donato Liloia1,2

1GCS-fMRI, Koelliker Hospital and Department of Psychology, University of Turin, Turin, Italy.

2FOCUS Laboratory, Department of Psychology, University of Turin, Turin, Italy.

3Department of Physics, University of Turin, Turin, Italy.

4Research Imaging Institute, University of Texas Health Science Center at San Antonio, TX, USA.

5Biggs Institute for Alzheimer’s and Neurodegenerative Diseases, University of Texas Health Science Center at San Antonio, TX, USA.

Correspondence: Dr. Jordi Manuello, PhD.

Department of Psychology, Via Giuseppe Verdi 10, 10124 Turin, Italy.

E-mail: [jordi.manuello@unito.it](mailto:jordi.manuello@unito.it)

**Supplementary Material**

**Activation likelihood estimation statistical description**

Here we follow the treatment by Samartsidis, Montagna, Nichols, & Johnson1 of the activation likelihood estimation (ALE) algorithm. Suppose to have fMRI experiments, each with foci, so that is the total number of foci. Let the three-dimensional coordinate represent the position of the -th focus in the -th study. The basic idea of ALE is to model the probability that a voxel is the true location of with a discretized (over the voxels) and truncated (outside the brain) Gaussian distribution , centered on and whose standard deviation depends on the number of participants in the -th study:2

Where is a normalization constant. This procedure produces focus maps, i.e. a map for every focus. The next step consists in determining for every study the maximum of , over the foci of study ,

.

is called the modeled activation map (MA); it quantifies the probability the focus closest a voxel is truly located at . Finally, the ALE statistic is computed as

.

This expression represents the probability that at least one of the nearest foci of activation is localized in . To determine the statistical significance of the activation probabilities we can use the Monte Carlo method. Concerning the calculation of the ALE, the null hypothesis is that the peaks of the coordinates are distributed uniformly across the brain, so that the ALE statistical analysis reflects the probability that at least a peak is truly localized in a region for which the null hypothesis is discarded. Therefore, we can be confident that in the “significant”

**Supplementary References**

1. Samartsidis P, Montagna S, Nichols TE, Johnson TD. The coordinate-based meta-analysis of neuroimaging data. *Stat Sci*. 2017;32(4):580-599. doi:10.1214/17-STS624

2. Eickhoff SB, Laird AR, Grefkes C, Wang LE, Zilles K, Fox PT. Coordinate-based activation likelihood estimation meta-analysis of neuroimaging data: a random-effects approach based on empirical estimates of spatial uncertainty. *Hum Brain Mapp*. 2009;30(9):2907-2926. doi:10.1002/hbm.20718
